# Supplementary material for: Comparative Effect of Seed Coating and Biopriming of Bacillus aryabhattai Z-48 on Seedling Growth, Growth Promotion, and Suppression of Fusarium Wilt Disease of Tomato Plants
Source: MDPI journal article supplement (doi:10.3390/microorganisms12040792), 2024-04-14
Supplement: s1 [file s1]

**Table S1:** Wilt scoring of *Fusarium oxysporum*.

| Score | Description                                 |
|-------|---------------------------------------------|
| 0     | No symptoms                                 |
| 1     | less than 25 % leaves wilted                |
| 2     | 25–50 % leaves wilted                       |
| 3     | 51–75 % leaves wilted                       |
| 4     | More than 75 % leaves wilted or plants dead |
